# Supplementary material
Source: publisher figshare collection journal article supplement (https://acs.figshare.com/ndownloader/files/24701536)
Supplement: Supplementary file 1 [file 24701536]

Compound	SMILES
21	CC1=CC(C(O)=O)=NC(N2CCC(OC3=CC=CC=C3C(F)(F)F)CC2)=N1
(±)-27	CC1=CC(C(O)=O)=NC(N2CCC(OC3=C(C(F)(F)F)C=CC=C3)C2)=N1
32	CC1=CC(C(O)=O)=NC(N2CC(OC3=CC=CC=C3C(F)(F)F)C2)=N1
38	CC1=CC(C(O)=O)=NC(N2CC(COC3=C(C(F)(F)F)C=CC=C3)C2)=N1
(±)-44	CC1=CC(C(O)=O)=NC(N2CCC(COC3=C(C(F)(F)F)C=CC=C3)C2)=N1
(R)-50	CC1=CC(C(O)=O)=NC(N2CC[C@@H](COC3=C(C(F)(F)F)C=CC=C3)C2)=N1
(S)-56	CC1=CC(C(O)=O)=NC(N2CC[C@H](COC3=C(C(F)(F)F)C=CC=C3)C2)=N1
(±)-62	CC1=CC(C(O)=O)=NC(N2CC(COC3=C(C(F)(F)F)C=CC=C3)CCC2)=N1
(±)-67	CC1=CC(C(O)=O)=NC(N2CCC3(CN(C4=C(C(F)(F)F)C=CC=C4)CC3)C2)=N1
(±)-71	CC1=CC(C(O)=O)=NC(N2CCC(CSC3=C(C(F)(F)F)C=CC=C3)C2)=N1
(±)-76	CC1=CC(C(O)=O)=NC(N2CCC(CNC3=C(C(F)(F)F)C=CC=C3)C2)=N1
(±)-80	CC1=CC(C(O)=O)=NC(N2CCC(OCC3=C(C(F)(F)F)C=CC=C3)C2)=N1
(±)-83	CC1=CC(C(O)=O)=NC(N2CCC(COC3=C(C(C)(C)C)C=CC=C3)C2)=N1
(±)-84	CC1=CC(C(O)=O)=NC(N2CCC(COC3=C(C4CCCC4)C=CC=C3)C2)=N1
(±)-85	CC1=CC(C(O)=O)=NC(N2CCC(COC3=C(C4CCCCC4)C=CC=C3)C2)=N1
(±)-86	CC1=CC(C(O)=O)=NC(N2CCC(COC3=C(C(F)(F)F)C(Cl)=CC=C3)C2)=N1
(±)-87	CC1=CC(C(O)=O)=NC(N2CCC(COC3=C(C(F)(F)F)C=C(F)C=C3)C2)=N1
(±)-88	CC1=CC(C(O)=O)=NC(N2CCC(COC3=C(C(F)(F)F)C=CC(F)=C3)C2)=N1
(±)-89	CC1=CC(C(O)=O)=NC(N2CCC(COC3=C(C(F)(F)F)C=CC=C3F)C2)=N1
(±)-90	CC1=CC(C(O)=O)=NC(N2CCC(COC3=C(C(F)(F)F)C=CC(OC)=C3)C2)=N1
(±)-91	CC1=CC(C(O)=O)=NC(N2CCC(COC3=CC(C(F)(F)F)=CC(C(F)(F)F)=C3)C2)=N1
(±)-92	CC1=CC(C(O)=O)=NC(N2CCC(COC3=C(C(F)(F)F)C=CN=C3)C2)=N1
(±)-93	CC1=CC(C(O)=O)=NC(N2CCC(COC3=C(C(F)(F)F)N=CC=C3)C2)=N1
(±)-94	FC(C(C=CC=C1)=C1OCC2CN(C3=NC=CC(C(O)=O)=N3)CC2)(F)F
(±)-95	CC1=CC(C(O)=O)=NC(N2CCC(COC3=C(C(F)(F)F)C=CC=C3)C2)=C1
(±)-96	FC(C(C=CC=C1)=C1OCC2CN(C3=CC=CC(C(O)=O)=N3)CC2)(F)F
(±)-97	FC(C(C=CC=C1)=C1OCC2CN(C3=NC=CC=C3C(O)=O)CC2)(F)F
(±)-98	FC(C=CC(C(O)=O)=C1)=C1N2CCC(COC3=C(C(F)(F)F)C=CC=C3)C2
(±)-99	CC1=CC(C(NS(=O)(C)=O)=O)=NC(N2CCC(COC3=C(C(F)(F)F)C=CC=C3)C2)=N1
(±)-100	CC1=CC(C(N)=O)=NC(N2CCC(COC3=C(C(F)(F)F)C=CC=C3)C2)=N1
(±)-101	CC1=CC(C(NC)=O)=NC(N2CCC(COC3=C(C(F)(F)F)C=CC=C3)C2)=N1
(±)-102	CC1=CC(C(NC2CC2)=O)=NC(N3CCC(COC4=C(C(F)(F)F)C=CC=C4)C3)=N1
(±)-103	CC1=CC(C2=NNN=N2)=NC(N3CCC(COC4=C(C(F)(F)F)C=CC=C4)C3)=N1
